# Supplementary material
Source: PubMed Central journal article supplement (PMC3600377)
Supplement: NIHMS429487-supplement-Supplement_1.pdf [file NIHMS429487-supplement-Supplement_1.pdf]

# TRQ

We are interested in gaining a better understanding of what happens when people stop using drugs and then start using them again. We would like to ask some questions about what happens when you have been abstinent for awhile and then start using drugs again.

Please think about the last few times you have voluntarily stopped using *all* drugs for at least a week. Then think about what happens when you start using again. Please rate your agreement with the statements below about what *generally* happens when you return to using drugs. Please check the box [  ] that corresponds with your answer.

|                                                                                               | Strongly Disagree | Disagree | Unsure | Agree | Strongly Agree |
|-----------------------------------------------------------------------------------------------|-------------------|----------|--------|-------|----------------|
| 1. I think a lot about using drugs before I start using again.                                |                   |          |        |       |                |
| 2. <i>One day</i> before I start using drugs again, I am sure I won't.                        |                   |          |        |       |                |
| 3. I never know ahead of time if I'm going to start using again.                              |                   |          |        |       |                |
| 4. I think about using drugs for <i>more than a day</i> before I start using again.           |                   |          |        |       |                |
| 5. When I start using drugs again, it's on the spur of the moment.                            |                   |          |        |       |                |
| 6. When I decide to use drugs again, it takes <i>less than an hour</i> before I actually use. |                   |          |        |       |                |
| 7. It takes me a while, weighing the pros and cons, before I decide to use again.             |                   |          |        |       |                |
| 8. I crave for <i>less than one day</i> before I start using again.                           |                   |          |        |       |                |
| 9. <i>A few minutes</i> before I start using again, I'm sure I won't.                         |                   |          |        |       |                |
| 10. When I start using drugs again, it's impulsive.                                           |                   |          |        |       |                |
| 11. When I decide to use drugs again, it takes <i>more than a day</i> before I actually use.  |                   |          |        |       |                |
| 12. I spend a lot of time preparing for my return to drug use.                                |                   |          |        |       |                |
| 13. <i>One hour</i> before I start using again, I'm sure I will.                              |                   |          |        |       |                |
| 14. I never know I will be using drugs again until it happens.                                |                   |          |        |       |                |
| 15. When I decide to use drugs again, it takes <i>less than a day</i> before I actually use.  |                   |          |        |       |                |

|                                                                                                      | Strongly Disagree | Disagree | Unsure | Agree | Strongly Agree |
|------------------------------------------------------------------------------------------------------|-------------------|----------|--------|-------|----------------|
| 16. I crave for <i>less than one hour</i> before I start using drugs again.                          |                   |          |        |       |                |
| 17. I don't think about using drugs again before I start.                                            |                   |          |        |       |                |
| 18. <i>A few minutes</i> before I start using drugs again, I'm sure I will.                          |                   |          |        |       |                |
| 19. I am surprised when I start using drugs again.                                                   |                   |          |        |       |                |
| 20. I think about using drugs for <i>less than a day</i> before I start using again.                 |                   |          |        |       |                |
| 21. I don't experience cravings before I start using drugs again.                                    |                   |          |        |       |                |
| 22. <i>One day</i> before I start using drugs again, I'm sure I will.                                |                   |          |        |       |                |
| 23. I think about using drugs for <i>less than an hour</i> before I start using again.               |                   |          |        |       |                |
| 24. I spend a lot of time trying to resist thoughts of using before I start again.                   |                   |          |        |       |                |
| 25. I think about using drugs for <i>less than a few minutes</i> before I start using again.         |                   |          |        |       |                |
| 26. I know ahead of time if I'm going to start using again.                                          |                   |          |        |       |                |
| 27. When I decide to use drugs again, it takes <i>less than a few minutes</i> before I actually use. |                   |          |        |       |                |
| 28. When I start using drugs again, it's not planned.                                                |                   |          |        |       |                |
| 29. I crave for more than <i>one day</i> before I start using again.                                 |                   |          |        |       |                |
| 30. I spend several days planning before I start using drugs again.                                  |                   |          |        |       |                |
| 31. When I decide to use drugs again, it takes <i>less than a few seconds</i> before I actually use. |                   |          |        |       |                |
| 32. I crave for <i>less than a few minutes</i> before I start using drugs again.                     |                   |          |        |       |                |
| 33. <i>An hour</i> before I start using again, I'm sure I won't.                                     |                   |          |        |       |                |
