# Supplementary material
Source: PubMed Central journal article supplement (PMC3600377)
Supplement: NIHMS429487-supplement-Supplement_2.pdf [file NIHMS429487-supplement-Supplement_2.pdf]

Date: \_\_\_\_\_

ID: \_\_\_\_\_

# TRQ

We are interested in gaining a better understanding of what happens when people stop using drugs and then start using them again. We would like to ask some questions about what happens when you have been abstinent for a while and then start using drugs again. Please think about the last few times you have voluntarily stopped using *all* drugs for at least one week. The following questions will explore the time leading up to your relapse.

**Please think about each statement below and rate how often they happen when you return to using drugs. Circle one number for each item. Be sure to answer every question.**

|                                                                                 | Always | Almost Always | Sometimes | Almost Never | Never |
|---------------------------------------------------------------------------------|--------|---------------|-----------|--------------|-------|
| 1. When I start using drugs again, it's on the spur of the moment.              | 5      | 4             | 3         | 2            | 1     |
| 2. I think about using drugs for less than a day before I start using again.    | 5      | 4             | 3         | 2            | 1     |
| 3. I know ahead of time that I'm going to start using again.                    | 5      | 4             | 3         | 2            | 1     |
| 4. I crave for more than a day before I start using again.                      | 5      | 4             | 3         | 2            | 1     |
| 5. I never know ahead of time if I'm going to start using again.                | 5      | 4             | 3         | 2            | 1     |
| 6. I crave for less than one hour before I start using drugs again.             | 5      | 4             | 3         | 2            | 1     |
| 7. I spend a lot of time preparing for my return to drug use.                   | 5      | 4             | 3         | 2            | 1     |
| 8. I don't think about using drugs again before I start                         | 5      | 4             | 3         | 2            | 1     |
| 9. I crave for less than one day before I start using again.                    | 5      | 4             | 3         | 2            | 1     |
| 10. I plan for several days before I start using drugs again.                   | 5      | 4             | 3         | 2            | 1     |
| 11. When I start using drugs again, it's impulsive.                             | 5      | 4             | 3         | 2            | 1     |
| 12. I think about using drugs for less than an hour before I start using again. | 5      | 4             | 3         | 2            | 1     |
| 13. The day before I start using drugs again, I'm sure I will.                  | 5      | 4             | 3         | 2            | 1     |
| 14. Once I decide to use drugs again, I use within a few seconds.               | 5      | 4             | 3         | 2            | 1     |
| 15. Once I decide to use drugs again, I use in less than a day.                 | 5      | 4             | 3         | 2            | 1     |
| 16. I never know I will be using drugs again until it happens.                  | 5      | 4             | 3         | 2            | 1     |
| 17. I think about using drugs for more than a day before I start using again.   | 5      | 4             | 3         | 2            | 1     |
| 18. When I start using drugs again, it's not planned.                           | 5      | 4             | 3         | 2            | 1     |
| 19. Once I decide to use drugs again, I use in less than an hour.               | 5      | 4             | 3         | 2            | 1     |
| 20. I think a lot about using drugs before I start using again.                 | 5      | 4             | 3         | 2            | 1     |
