# Supplementary material
Source: PubMed Central journal article supplement (PMC3600377)
Supplement: NIHMS429487-supplement-Supplement_3.pdf [file NIHMS429487-supplement-Supplement_3.pdf]

Date: \_\_\_\_\_

ID: \_\_\_\_\_

# IRQ

We are interested in gaining a better understanding of what happens when people stop using drugs and then start using them again. We would like to ask some questions about what happens when you have been abstinent for a while and then start using drugs again. Please think about the last few times you have voluntarily stopped using all drugs for at least one week. The following questions will explore the time leading up to your relapse.

***Please think about each statement below and decide whether it is an accurate statement about you. Circle one answer for each item. Be sure to answer every question.***

|                                                                                | <b>False</b> | <b>Slightly True</b> | <b>Mainly True</b> | <b>Very True</b> |
|--------------------------------------------------------------------------------|--------------|----------------------|--------------------|------------------|
| 1. I never know ahead of time if I'm going to start using again.               | F            | ST                   | MT                 | VT               |
| 2. I crave for less than one hour before I start using drugs again.            | F            | ST                   | MT                 | VT               |
| 3. I plan for several days before I start using drugs again.                   | F            | ST                   | MT                 | VT               |
| 4. I never know I will be using drugs again until it happens.                  | F            | ST                   | MT                 | VT               |
| 5. I think about using drugs for more than a day before I start using again.   | F            | ST                   | MT                 | VT               |
| 6. I think about using drugs for less than an hour before I start using again. | F            | ST                   | MT                 | VT               |
| 7. I crave for less than one day before I start using again.                   | F            | ST                   | MT                 | VT               |
| 8. When I start using drugs again, it's not planned.                           | F            | ST                   | MT                 | VT               |
| 9. I think a lot about using drugs before I start using again.                 | F            | ST                   | MT                 | VT               |
